# Supplementary material
Source: PubMed Central journal article supplement (PMC4651757)
Supplement: NIHMS731431-supplement-Supplemental_Material.pdf [file NIHMS731431-supplement-Supplemental_Material.pdf]

## SUPPLEMENTAL MATERIAL

### Expanded Methods

#### Overview of the Model

The most frequently used abbreviations are listed in **Supplemental Table 1**. A decision-analytic model (**Figure 1**) was used to compare the aggregate intervention costs and effectiveness associated with six diagnostic and lateralization strategies in a simulated cohort of resistant hypertensive patients. Patients in strategies 1-6 underwent screening aldosterone to renin ratio (ARR) as per standard of care; patients in strategy 7 were treated with mineralocorticoid receptor antagonist (MRA) without ARR screen or other work-up.<sup>1,2</sup> Following positive screening ARR (as defined by individual studies and tested with sensitivity analysis), patients underwent one of the following strategies to identify those patients with unilateral, surgically-correctable disease: 1) Confirmatory saline-infusion test (SIT), CT, and AVS (strategy SIT/CT/AVS), 2) CT and AVS (CT/AVS), 3) SIT and AVS (SIT/AVS), 4) AVS only, 5) SIT and CT (SIT/CT), and 6) CT only (**Table 2**). In strategies SIT/CT/AVS and CT/AVS, all patients proceeded to AVS unless no abnormality is found on CT scan. In strategy MRA only, all patients were treated upfront with MRA (i.e. spironolactone) without further work-up or risk. Based on the best available published evidence (for references see **Supplemental Table 2**), we assumed that patients with surgically-treated PA would obtain an additional 10 mmHg reduction in SBP compared to PA patients treated with MRA.

The analysis was performed from a modified societal perspective. The costs of screening, surgery, complications, and medications were included in the analysis, but non-health care related costs to the patient (i.e. patient absence from work, cost for transportation) were not. Best available cost and probability estimates were extracted from the literature (**Table 3 and Supplemental Table 2**). TreeAge Pro 2014 (TreeAge Software, Williamstown, MA) was used to construct and analyze the model. The change in systolic blood pressure (SBP, mmHg), number of medications<sup>3-7</sup>, and differential costs of anti-hypertensive regimens for the years following the initial intervention were calculated for each strategy in the immediate intervention model.

Changes in SBP were subsequently converted into gains in quality-adjusted life years (QALYs) using primary National Health and Nutrition Examination Survey (NHANES) data on concomitant risk factors and an existing cardiovascular disease simulation model to calculate incremental cost-effectiveness ratios (ICERs, cost per QALY) for the seven competing strategies. ICERs were assessed by ranking strategies (including the strategy of treating all patients with MRAs) in increasing order of cost and calculating the ratios of additional cost per additional QALY for successively more costly strategies. Strategies that cost more and had fewer life years/QALYs than another strategy (i.e. strongly dominated), or which were less effective but had a larger ICER (i.e., weakly dominated) were not considered further. A willingness-to-pay (WTP) threshold of \$US 150,000/QALY gained was used as a benchmark for cost-effectiveness, following the ACC/AHA paper position paper on integration of cost-effective data into clinical practice.<sup>8</sup> The undominated strategies comprise the “efficiency frontier”; among these, the one with the largest ICER below the WTP threshold would be the cost-effective choice.

For the intervention decision tree, we designated our base-case a patient with resistant hypertension (RH). For the primary analysis, we made a number of important assumptions: 1) patients were all considered surgical candidates (i.e. American Society of Anesthesiologists

Physical Status Classification class I or II)<sup>9</sup>; 2) patients diagnosed with unilateral PA (APA) all underwent laparoscopic adrenalectomy per standard of care; 3) patients identified to have PA but who did not lateralize were given spironolactone at 25 mg daily; 4) false-positive rates (i.e. falsely determined to be PA) of CT results for RH patients with primary hypertension were reflective of prevalence of incidental adrenal nodules in the population<sup>10, 11</sup>; 5) if abdominal CT indicated an abnormality on both sides, patients either proceeded to AVS and surgery if AVS lateralized to one adrenal gland (strategies SIT/CT/AVS and CT/AVS), or in CT only strategies (strategies SIT/CT and CT only) patients were treated with MRA; 6) in strategies with CT, those cases with bilateral normal adrenal findings were treated with MRA, while strategies without CT all went to AVS following positive screening, and 7) if there was a failure of AVS – either with cannulation or from complication – patients did not undergo a repeat procedure and went on to get MRA.

Next, from 40,790 patients available in the continuous NHANES database from 2005-2012, a cohort of 836 patients was selected according to the following criteria: 1) patients with SBP  $\geq$  160 mmHg (presumed resistant hypertension) and 2) patients with available data on cardiovascular risk factors required to assess 10-year Framingham risk score (i.e. age, gender, SBP, total cholesterol, HDL cholesterol, smoking status).<sup>12</sup> Out of 836 patients, 126 (15%) had a prior history of prior myocardial infarction or stroke. Patients with missing data for smoking status were assumed to be non-smokers. This assumption led to a 17% prevalence of smokers in the population, which is consistent with reported estimates in this population.<sup>13</sup> These patients were sampled with replacement to create the simulation cohort (1,000,000 patients) and entered into an established cardiovascular disease Markov model with microsimulation (**Supplemental Figure 1**) to assess comparative lifetime costs and discounted QALYs based on the intervention costs and change in SBP of each strategy.<sup>14</sup> A detailed description of the Cardiovascular Disease Policy Model (CVDPM) is provided below. Effects were measured in QALYs gained. Future costs and QALYs were discounted at 3% per annum according to recommendations of the Panel on Cost-Effectiveness in Health and Medicine.<sup>15</sup>

### Costs

Physician and facility costs were estimated from the Healthcare Common Procedure Coding System (HCPCS), Diagnosis Related Group (DRG), and/or Ambulatory Payment Classification (APC) as appropriate using Medicare national reimbursement data for 2013 for physician visits, imaging, laboratory tests, surgery, and hospitalization (**Table 3**).<sup>16</sup> Medicare Schedule Part A, inpatient services, and Part B, outpatient services, were assessed separately. Anesthesiology fees were based on average anesthesia time (15 minute increments), 2013 HCPCS Anesthesia Base Units, and the 2013 national anesthesia conversion factor (\$21.9243).<sup>16</sup> Average wholesale drug prices were obtained from the RED BOOK® on-line via Micromedex®2 (Truven Health Analytics, Greenwood Village, Colorado). All costs are measured in 2013 U.S. dollars.

### Sensitivity analyses

We performed univariate sensitivity analyses to assess effects of varying key model parameters upon our results. In particular, we varied prevalence of PA and incidentally identified adrenal nodules, the proportion of patients with APA (i.e. unilateral, surgically correctable disease), test performance characteristics (e.g. assessing various ARR threshold values for a “positive” screen), cost estimates, and the effect sizes based on underlying etiology and treatment (**Table 3**). Model inputs were tested over ranges reported in the literature when available and over a

wide-range (i.e. 0.5-1.5 \* Base Case Estimate, BCE) when not available. While costs of diagnostic studies are unlikely to vary greatly, we tested a hypothetical range to assess the effect on incremental cost-effectiveness ratios. Moreover, while adjustments of medications and potential for repeated tests due to mistiming of tests are difficult to quantify, we tested 0.5 – 1.5 \* base-case cost range for key variables.

Probabilistic sensitivity analysis (PSA) was performed to assess the effects of parameter estimate uncertainty. Distributions around base case estimates were as follows:  $\beta$ -distributions for probabilities,  $\gamma$ -distributions for cost estimates, and normal distributions for effect measures. Each of 1,000 random samples of parameter distributions was used to perform 1,000,000 simulated patients through the CVD model. Net Health Benefit was calculated [(Effectiveness-Cost)/WTP] was compared between strategies for each sample.

### **Health-related quality of life**

Health-related quality-of-life (HRQoL) adjustments were applied in two stages, first considering only effects of CVD, and then also considering reductions in quality of life associated with untreated PA. Utility weights for baseline primary hypertensive patients and downstream health states within the CVD model were based on a broad national sample of community-based, patient-reported EQ-5D utility scores associated with chronic diseases.<sup>17</sup> Prior data indicate that patients with PA have worse quality of life scores when compared to patients with primary hypertension.<sup>6, 18, 19</sup>

Ranges of utility weights (i.e. measure of HRQoL) were calculated from longitudinal survey data.<sup>18</sup> 196 surveys were available from 65 patients. Short Form-12v1® responses were available for a cohort of PA-confirmed patients before and after treatment with adrenalectomy (n= 39) or MRA (n=12). The post-treatment data was collected on average 6 months following either MRA initiation or surgery. Data were then catalogued and translated into interval scale utilities (0 = dead to 1 = perfect health) using the QualityMetric health state score system, SF6D®, for integration of a reasonable range in change of utility into the CVD model.<sup>6, 18, 19</sup> For the purposes of this study, changes in HRQoL (i.e. utility) were compared to the baseline of a patient with resistant hypertension and the estimates are based on median changes post-treatment for the surgical versus medically treated groups. Proportions of the cohort in each state (i.e. PA patients treated with surgery, PA patients treated with MRA, primary hypertensive patients treated with MRA, and dead) were calculated for each strategy. Median change [IQR] in utility scores was used as the data were non-normal. Median change in PA patients treated with MRA was 0 [-0.056, 0.017]; Median change PA treated with surgery 5.4 [0.000, 0.079]. In our second set of analyses, these utility differences were integrated into the base value for each intervention strategy for the CVD model (and discounted at 3% per annum for subsequent years).

### **Description of the Cardiovascular Disease Policy Model<sup>14</sup>**

The Cardiovascular Disease Policy Model (CVDPM), coded in C++, integrates information on the associations between CVD risk factors and incidence, the prevalence of risk factors in the population, the natural and treated history of disease, and the effects of CVD on survival, quality of life, and medical care cost. The model is designed to be able to evaluate a wide range of cardiovascular disease prevention and treatment policies. It is designed to produce results for cost-effectiveness, comparative effectiveness, and projection analyses.

## **Model Population**

The model is populated with a list of individuals with accompanying risk factor data. The CVD risk factors necessary to run the model are: sex, age, systolic blood pressure, total cholesterol, HDL cholesterol, smoking status, and diabetes status. The model samples from the patient list, taking the initial set of patient risk factor characteristics for a drawn individual and simulating every subsequent year of the individual's life using Monte Carlo micro-simulation techniques and common random numbers.<sup>20</sup> Three main events occur each model cycle (one-year cycle length): 1) updating of the risk factors (e.g. an increase in systolic blood pressure); 2) potential transitions into a CVD health state; and 3) preventative interventions (i.e. screening and medication). Costs and health state utilities are also computed for each individual every year. After an individual's remaining lifespan is simulated with the model, a new individual is selected and added to the model population. Model population characteristics based on weighted sampling (with replacement) of individuals from the fasting data samples of the 2005-2006, 2007-2008, and 2009-2010 waves of the nationally representative National Health and Nutrition Examination Surveys (NHANES).<sup>21</sup>

## **Risk factors**

Risk factors for all individuals update each model cycle. These updates were based on regressions from nine waves of cross-sectional NHANES data (data collected between 1973-2010).<sup>22</sup> Specifically, systolic blood pressure, total and HDL cholesterol, and diabetes (statin-induced or otherwise) update as patients age in the model. All other individual characteristics, such as smoking and blood pressure treatment, do not change from baseline in the model.

## **Transitions**

The health states in the CVDPM are: Disease Free (DF), Coronary Heart Disease (CHD) or Cerebrovascular Accident (CVA) events, and death. The CHD events we modeled are myocardial infarction (MI), angina, and resuscitated cardiac arrest (RCA). The MI and angina health states are further classified to with and without revascularization, either with percutaneous coronary intervention (PTCI) or coronary artery bypass graft (CABG). At any given point in time, a simulated individual can only be in one health state. We also classify disease states as acute or chronic, with the first year a patient is in a disease state considered acute, and every subsequent year a patient remains in the same disease state as chronic. A patient cannot return to the DF state after transitioning into a chronic CVD state. **Supplemental Figure 1** shows the base structure of the model of how a DF individual can transition into other health states, and the appendix discusses in more detail all the possible transitions.

Individuals with no prior history of CVD enter into the model as DF, and those with prior history enter into the chronic state of that particular CVD event. The probability that a DF individual transitions into a CVA or CHD health state is derived from calibrated risk equations stemming from the Framingham Study, which factor in an individual's risk factors, and are subsequently converted to an event probability for the model.<sup>23,24</sup> Individual cans die from a non-CVD cause while in any health state, as well as a CVD-specific cause while in a CVD state. Individuals can also have repeat CVD events while in a CVD state. Transitions in the model are hierarchical, in which an individual faces the probability of the more severe events before less severe ones. For example, a DF individual would first face the probability of a non-CVD death, then a CVA event, and finally a CHD event. Likewise, an individual in the chronic MI state would first face the probability of a non-CVD death, then a chronic MI death, then a CVA event,

and finally a repeat MI event. If an individual has had multiple CVD events, the individual remains in the health state of the more severe event. Transition probabilities are either applied uniformly to all individuals or are age- and/or sex-specific. **Supplemental Table 4** lists the transition probabilities used in the CVDPM.

## Supplemental Tables

**Supplemental Table 1.** Frequently used abbreviations

| <b>Abbreviation</b> | <b>Explanation</b>                                                                                     |
|---------------------|--------------------------------------------------------------------------------------------------------|
| <b>APA</b>          | Aldosterone-producing adenoma                                                                          |
| <b>ARR</b>          | Aldosterone-renin ratio                                                                                |
| <b>AVS</b>          | Adrenal venous sampling                                                                                |
| <b>BAH</b>          | Bilateral adrenal hyperplasia (a.k.a. Bilateral idiopathic hyperplasia, idiopathic hyperaldosteronism) |
| <b>BCE</b>          | Base case estimate                                                                                     |
| <b>(S)BP</b>        | (Systolic) Blood pressure                                                                              |
| <b>CVD</b>          | Cardiovascular disease                                                                                 |
| <b>HRQoL</b>        | Health-related quality of life                                                                         |
| <b>HTN</b>          | Hypertension                                                                                           |
| <b>ICER</b>         | Incremental cost-effective ratio                                                                       |
| <b>JNC</b>          | Joint National Committee                                                                               |
| <b>MRA</b>          | Mineralocorticoid-receptor antagonists                                                                 |
| <b>PA</b>           | Primary hyperaldosteronism                                                                             |
| <b>QALY</b>         | Quality-adjusted life year                                                                             |
| <b>RH</b>           | Resistant hypertension                                                                                 |
| <b>SIT</b>          | Saline-infusion confirmatory testing                                                                   |
| <b>WTP</b>          | Willingness to pay                                                                                     |

**Supplemental Table 2.** Intervention model inputs and sources

| Parameter                                                                               | Value | Sensitivity analysis range | Source(s)       |
|-----------------------------------------------------------------------------------------|-------|----------------------------|-----------------|
| <i>Epidemiology</i>                                                                     |       |                            |                 |
| Prevalence of PA in resistant HTN                                                       | 0.20  | 0.11-0.23                  | 25-29           |
| Proportion of unilateral PA                                                             | 0.43  | 0.35-0.60                  | 30-33           |
| Prevalence of incidental adrenal nodules                                                | 0.05  | 0.01-0.09                  | 34-43           |
| <i>Test characteristics</i>                                                             |       |                            |                 |
| Sensitivity of screening (ARR)                                                          | 0.78  | 0.66-0.98                  | 44-47           |
| Specificity of screening testing (ARR)                                                  | 0.83  | 0.63-0.99                  | 44-47           |
| Sensitivity of confirmatory testing (SIT)                                               | 0.83  | 0.55-0.90                  | 48-51           |
| Specificity of confirmatory testing (SIT)                                               | 0.75  | 0.75-1.00                  | 48-51           |
| Probability of contralateral nodule CT in APA                                           | 0.12  | 0.06-0.13                  | 52-55           |
| Probability of true positive CT in APA (sensitivity given APA)                          | 0.59  | 0.49-0.62                  | 52-55           |
| Probability of bilateral CT abnormalities in APA                                        | 0.15  | 0.13-0.36                  | 52-55           |
| Probability of normal CT in APA                                                         | 0.14  | 0.07-0.25                  | 52-55           |
| Probability of bilateral CT abnormalities in BAH (sensitivity given BAH)                | 0.41  | 0.19-0.46                  | 52-55           |
| Probability of normal CT in BAH                                                         | 0.22  | 0.22-0.43                  | 52-55           |
| Probability of unilateral CT in BAH                                                     | 0.36  | 0.33-0.38                  | 52-55           |
| Lateralizing AVS with BAH (false-positive given true bilateral disease)                 | 0.02  | 0.02-0.20                  | 53, 56, 57      |
| Sensitivity of AVS for unilateral disease (true-positive given true unilateral disease) | 0.93  | 0.80-0.93                  | 52, 53, 57      |
| Proportion of unsuccessful adrenal vein cannulation                                     | 0.18  | 0.04-0.37                  | 52, 53, 55, 58  |
| <i>Procedural morbidity</i>                                                             |       |                            |                 |
| Morbidity from AVS (bleeding)                                                           | 0.01  | 0.006-0.07                 | 53, 57, 59      |
| Morbidity from surgery                                                                  | 0.07  | 0.06-0.08                  | 60              |
| Mortality from adrenalectomy                                                            | 0.01  | 0.00-0.01                  | 60              |
| <i>Treatment effects (AmmHg)</i>                                                        |       |                            |                 |
| SBP change with death/no treatment                                                      | 0.00  | -                          | -               |
| SBP change treatment of primary hypertensive patients with MRA                          | 10.00 | 4-22                       | 3, 5, 61-63     |
| SBP change treatment PA with MRA                                                        | 20.00 | 11-33                      | 3, 5, 6, 64, 65 |
| Incremental SBP change with PA                                                          | 10.00 | 0-20                       | 4, 6, 7, 57     |

|                                                                 |          |                 |               |
|-----------------------------------------------------------------|----------|-----------------|---------------|
| <b>adrenalectomy (over MRA)</b>                                 |          |                 |               |
| <i>Costs</i>                                                    |          |                 |               |
| <b>Screening ARR (CPT 82088, 84244,84132)</b>                   | \$93     | (0.5-1.5) × BCE | 16            |
| <b>Confirmatory saline infusion testing (CPT 96365, 93666)</b>  | \$141    | (0.5-1.5) × BCE | 16            |
| <b>Abdominal CT (CPT 74170)</b>                                 | \$329    | (0.5-1.5) × BCE | 16            |
| <b>Adrenal venous sampling (CPT 75893, 36500)</b>               | \$2,645  | (0.5-1.5) × BCE | 16            |
| <b>Adrenalectomy (surgery + anesthesia)* (CPT 60650, 00866)</b> | \$3,054  | (0.5-1.5) × BCE | 16            |
| <b>Hospitalization (DRG<sup>†</sup> 615)</b>                    | \$7,867  | (0.5-1.5) × BCE | 16            |
| <b>Hospitalization w/MCC (DRG 614)</b>                          | \$16,833 | (0.5-1.5) × BCE | 16            |
| <b>One year cost of spironolactone</b>                          | \$158    | (0.5-1.5) × BCE | Mircromedex®2 |

ARR – aldosterone to renin ratio; SIT – saline-infusion testing; APA – aldosterone producing adenoma; BAH – bilateral adrenal hyperplasia; MCC - major comorbidities or complications; SBP – systolic blood pressure; MRA: Mineralocorticoid-receptor antagonist; BCE – base-case estimate. \*Cost of anesthesia was based on the product of average anesthesia time (15 minute increments), 2013 HCPCS Anesthesia Base Units, and the national anesthesia conversion factor. †DRG - Diagnosis-related group for adrenal procedures with and without major comorbidities or complications. Operative times of laparoscopic adrenalectomy, were based on the results of a meta-analysis comparing retroperitoneal versus transperitoneal laparoscopic techniques.<sup>60</sup> Reported imaging test characteristics were elicited from a recent meta-analysis and other reports which had confirmation of disease with surgical pathology.<sup>52-54</sup>



**Supplemental Table 3. Disease progression inputs used in the CVD microsimulation model.**

| <b>Parameter</b>                                                                                               | <b>Value</b>                | <b>Source</b>          |
|----------------------------------------------------------------------------------------------------------------|-----------------------------|------------------------|
| <b><i>From Disease Free State</i></b>                                                                          |                             |                        |
| Non-CVD death                                                                                                  | Age- and sex-specific table | 66                     |
| CHD and stroke events                                                                                          | RF-based equations*         | 23, 24                 |
| % Cardiac Arrest                                                                                               | Age- and sex-specific table | 67                     |
| % MI (males)                                                                                                   | 0.35                        | 68                     |
| % MI (females)                                                                                                 | 0.20                        | 68                     |
| <b><i>Chronic mortality (i.e., post-1st year) multipliers (i.e., relative risks) for CVD health states</i></b> |                             |                        |
| Post-CHD, men <2 CHD events                                                                                    | 1.6                         | 69                     |
| Post-CHD, men ≥2 CHD events                                                                                    | 3.4                         | 69                     |
| Post-CHD, women <2 CHD events                                                                                  | 2.1                         | 69                     |
| Post-CHD, women ≥2 CHD events                                                                                  | 2.5                         | 69                     |
| Post-stroke                                                                                                    | 2.3                         | 70                     |
| <b><i>From Cardiac Arrest State</i></b>                                                                        |                             |                        |
| Acute (within 1 year) death                                                                                    | 0.954                       | 71                     |
| MI event                                                                                                       | 0.064                       | Assumption: same as MI |
| <b><i>From MI State</i></b>                                                                                    |                             |                        |
| Immediate death                                                                                                | 0.15                        | 72                     |
| Acute death (days 30-365)                                                                                      | Age- specific table         | 67                     |
| Acute CABG                                                                                                     | 0.082                       | 73                     |
| Acute PTCA                                                                                                     | 0.300                       | 73                     |
| % Procedure death                                                                                              | 0.009                       | 74                     |
| Acute 2nd MI (no PTCA)                                                                                         | 0.060                       | 75                     |
| Acute 2nd MI (after PTCA)                                                                                      | 0.052                       | 76                     |
| Repeat MI                                                                                                      | 0.064                       | 77                     |
| <b><i>From MI and CABG State</i></b>                                                                           |                             |                        |
| Acute post-CABG death                                                                                          | 0.027                       | 78                     |
| Acute 2nd MI                                                                                                   | 0.051                       | 76                     |
| Repeat MI                                                                                                      | 0.039                       | 77                     |
| <b><i>From Angina State</i></b>                                                                                |                             |                        |
| Acute death                                                                                                    | 0.045                       | 75                     |
| Acute cardiac arrest                                                                                           | 0.006                       | 79                     |
| Acute MI                                                                                                       | 0.035                       | 80                     |
| Acute CABG                                                                                                     | 0.200                       | 81                     |
| Acute PTCA                                                                                                     | 0.300                       | 81                     |
| MI event                                                                                                       | 0.035                       | 80                     |

|                                          |       |    |
|------------------------------------------|-------|----|
| <b><i>From Angina and CABG State</i></b> |       |    |
| Chronic (post 1st-year) death            | 0.018 | 82 |
| MI event                                 | 0.021 | 80 |
| <b><i>From Stroke State</i></b>          |       |    |
| Acute death                              | 0.140 | 83 |
| Repeat stroke event                      | 0.040 | 84 |
| MI event                                 | 0.022 | 85 |

**Supplemental Table 4.** Surgical outcomes and mortality by disease and strategy.

| <b>Strategy</b> | <b>Appropriate Surgical Therapy</b> | <b>Inappropriate Surgical Therapy*</b> | <b>Surgical Mortality</b> |
|-----------------|-------------------------------------|----------------------------------------|---------------------------|
| 1 - SIT/CT/AVS  | 0.420                               | 0.001                                  | 0.004                     |
| 2 - CT/AVS      | 0.506                               | 0.001                                  | 0.005                     |
| 3 - SIT/AVS     | 0.489                               | 0.002                                  | 0.005                     |
| 4 - AVS only    | 0.589                               | 0.004                                  | 0.006                     |
| 5 - SIT/CT      | 0.457                               | 0.035                                  | 0.007                     |
| 6 - CT only     | 0.551                               | 0.047                                  | 0.009                     |
| 7 - MRA only    | 0                                   | 0                                      | 0                         |

\*Including wrong-sided surgery, adrenalectomy for bilateral adrenal hyperplasia, and adrenalectomy for primary hypertension.

**Supplemental Figures**

**Supplemental Figure 1.** Model schematic of the cardiovascular disease model.

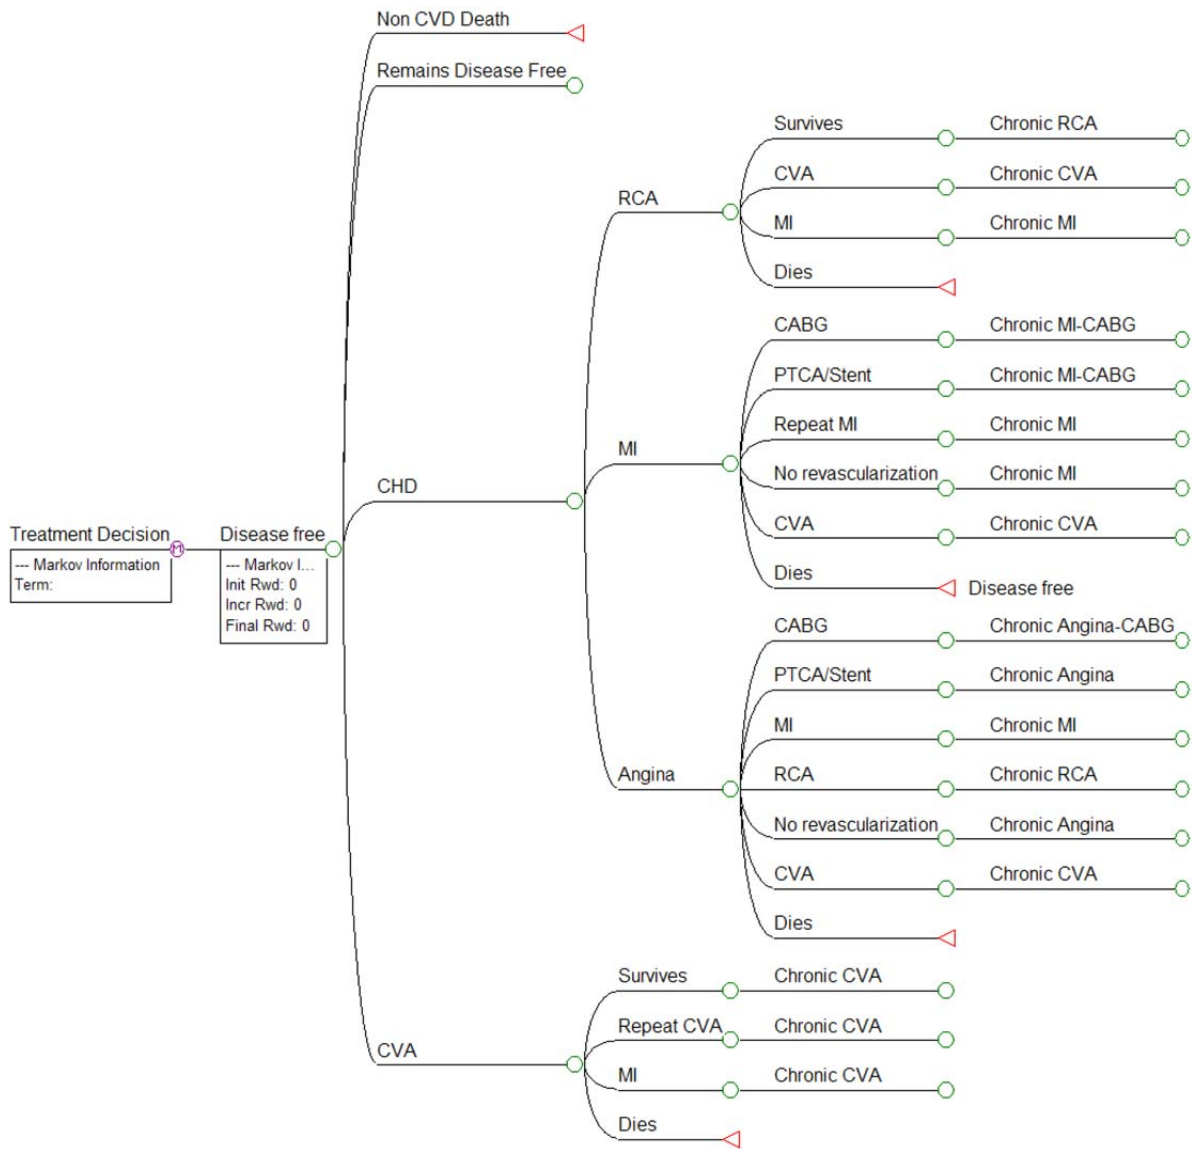

**Supplemental Figure 2.** Efficiency frontiers of a range of primary aldosteronism (PA) prevalence in the resistant hypertensive population for the: A) base-case analysis considering only effects of cardiovascular disease (CVD) on health related quality of life (HRQoL) and B) base-case analysis with differential patient-reported HRQoL associated with untreated PA. Only non-dominated strategies shown. In strategy CT/AVS, all patients proceeded to AVS unless no abnormality is found on CT scan. pAldo - prevalence of PA in the resistant hypertensive population.

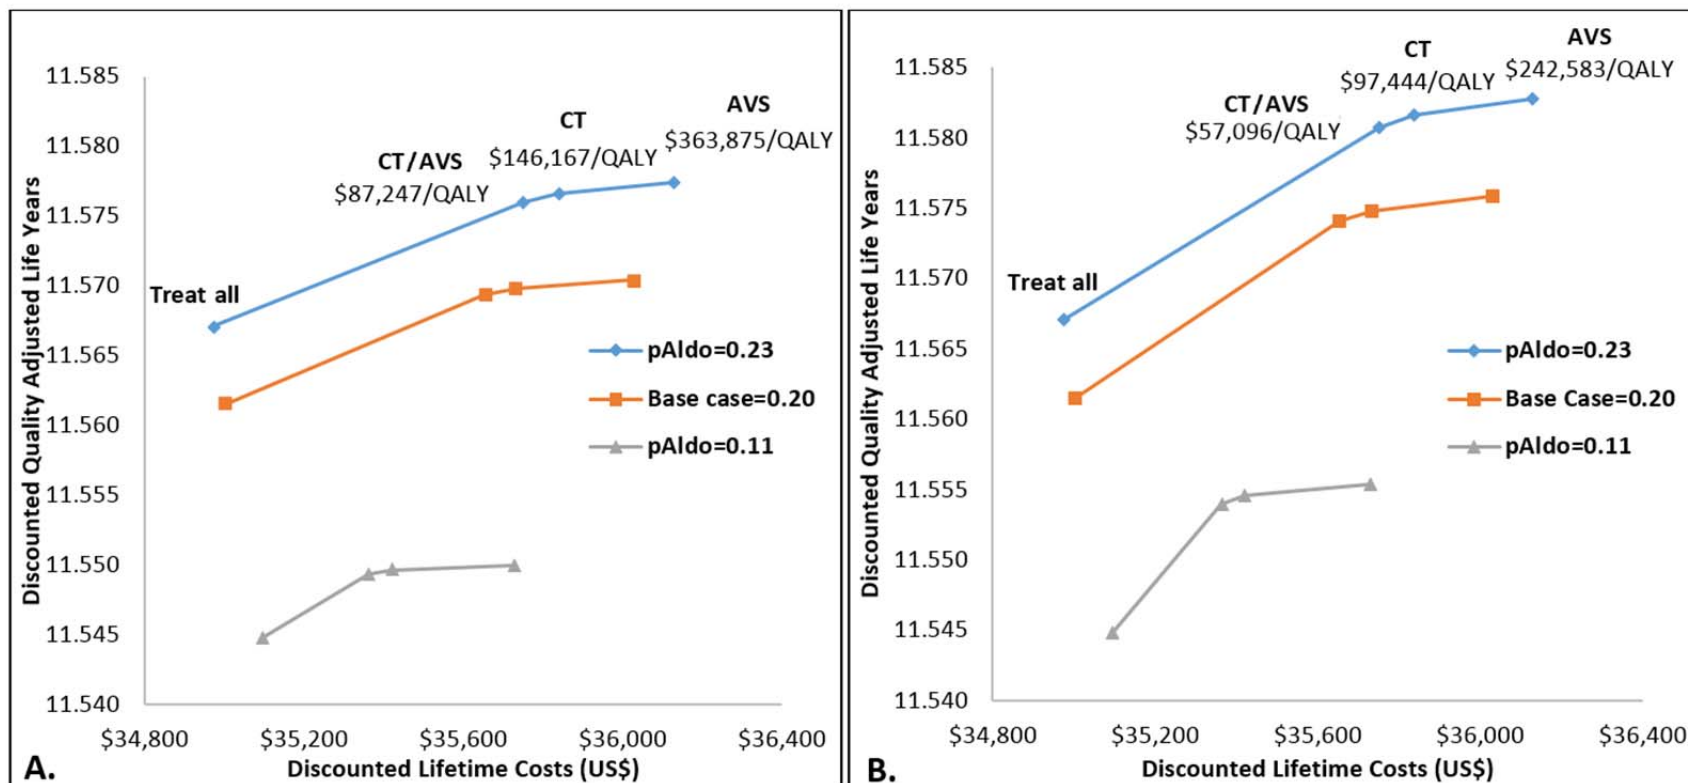

**Supplemental Figure 3.** Efficiency frontiers of a range of sensitivity (true-positive for PA) of screening with aldosterone to renin ratio (ARR): A) base-case analysis considering only effects of CVD on HRQoL, and B) base-case analysis with differential patient-reported HRQoL associated with untreated PA. Only non-dominated strategies shown. In strategy CT/AVS), all patients proceeded to AVS unless no abnormality is found on CT scan. pTP\_ARR - sensitivity of screening with ARR.

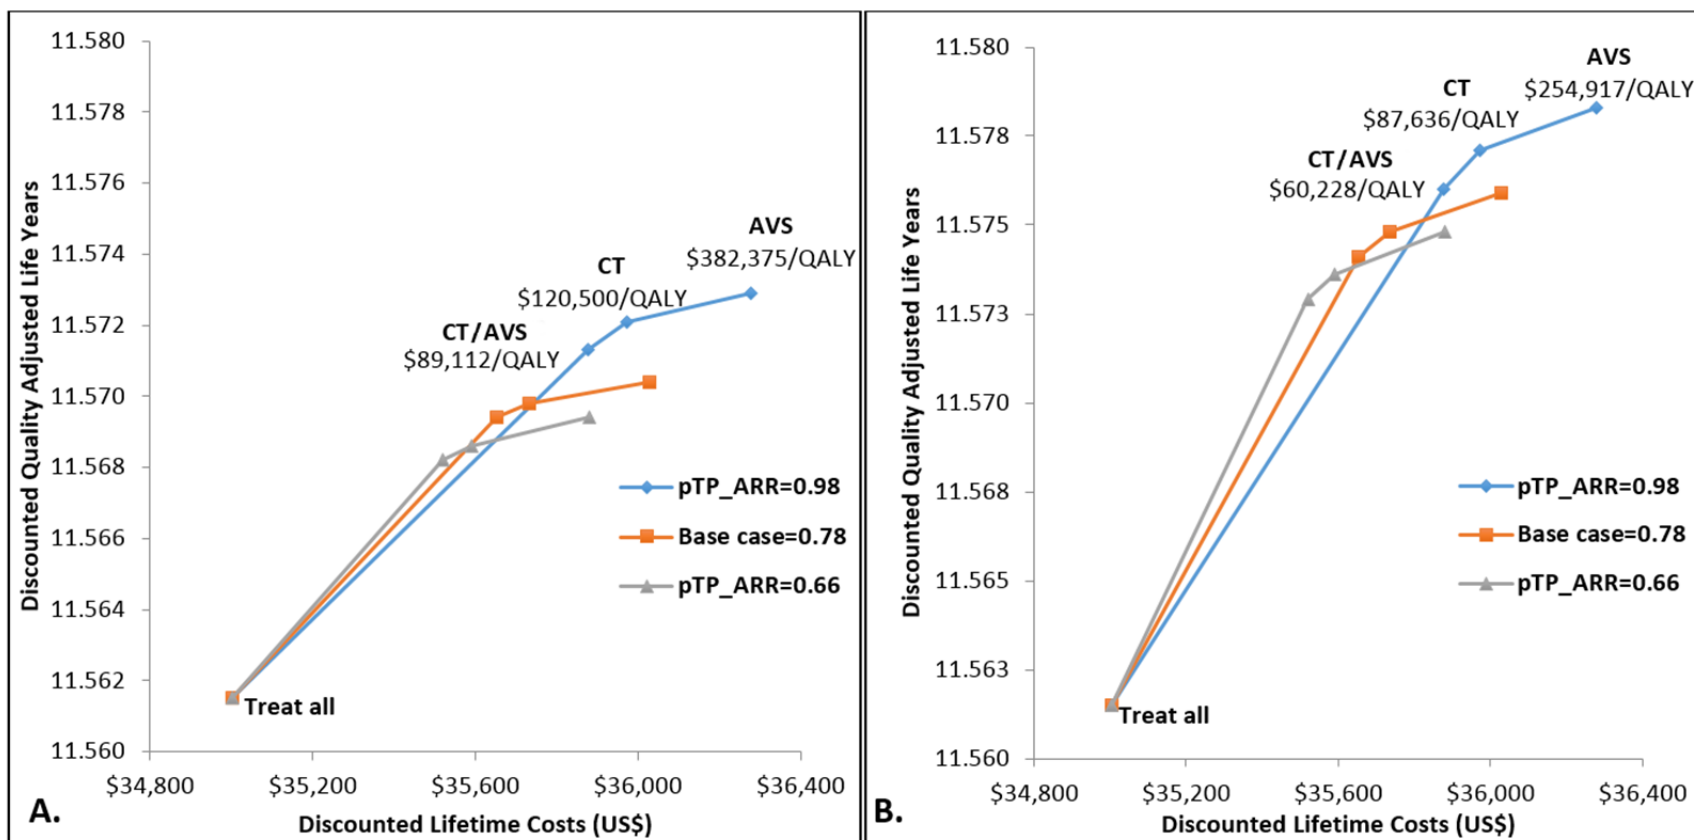

**Supplemental Figure 4.** Efficiency frontiers of a range of false positives (1- specificity) of screening with aldosterone to renin ratio (ARR): A) base-case analysis considering only effects of CVD on HRQoL, and B) base-case analysis with differential patient-reported HRQoL associated with untreated PA. Only non-dominated strategies shown. In strategy CT/AVS, all patients proceeded to AVS unless no abnormality is found on CT scan. pFP\_ARR – false positives (1-specificity) of screening with ARR.

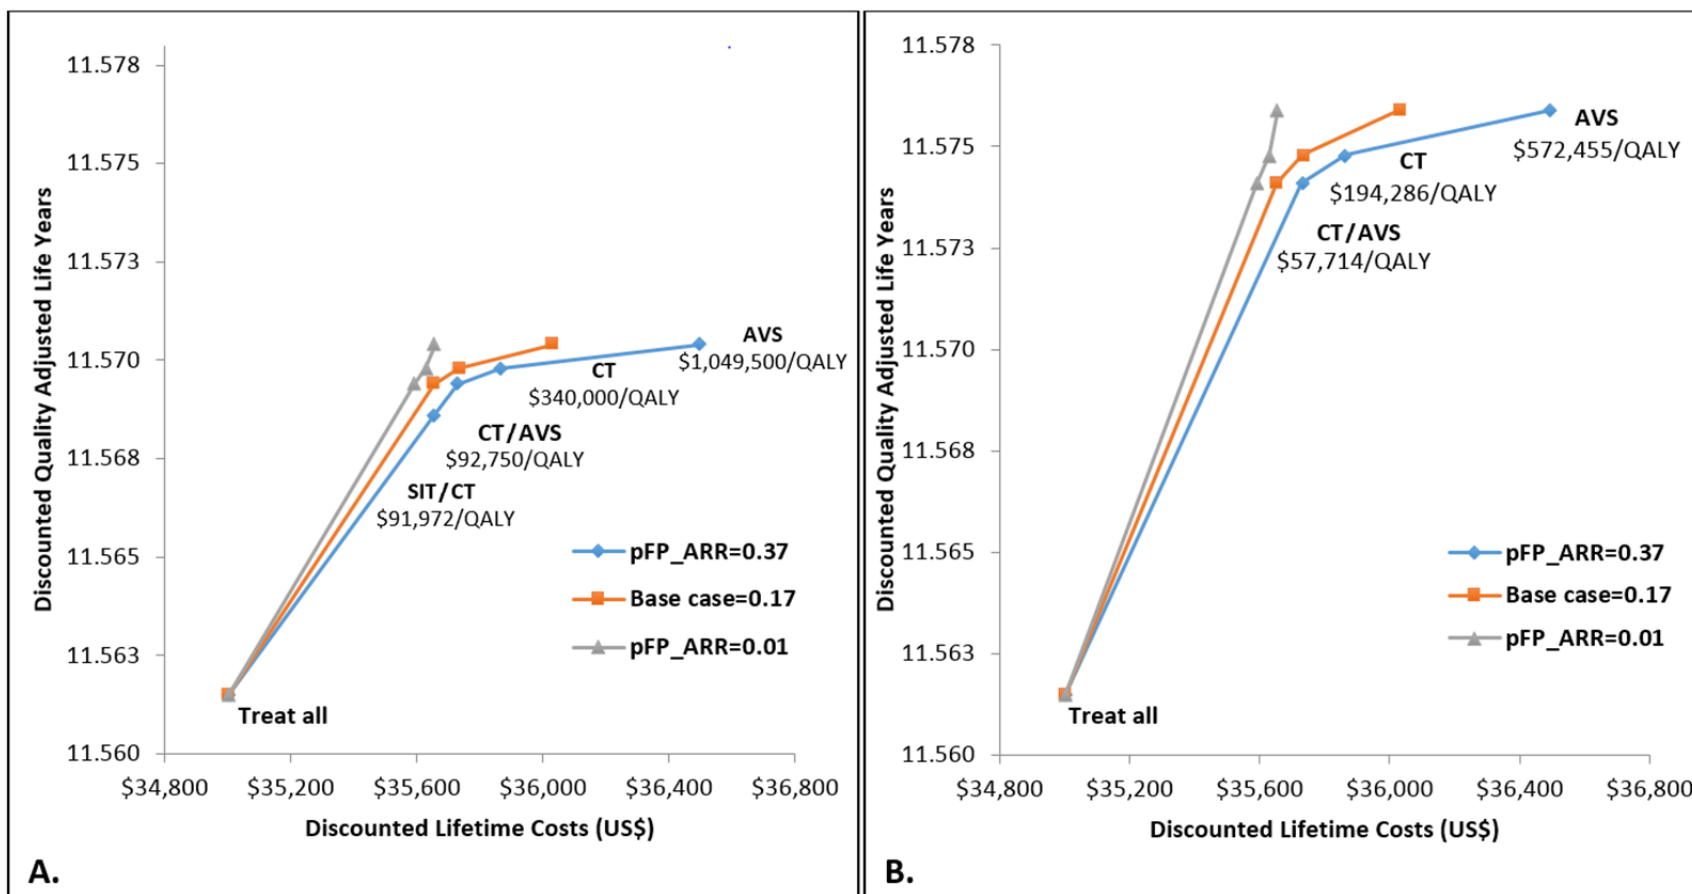

**Supplemental Figure 5.** Efficiency frontiers of various ranges of the cost of spironolactone: A) base-case analysis considering only effects of CVD on HRQoL, and B) base-case analysis with differential patient-reported HRQoL associated with untreated PA. Only non-dominated strategies shown. In strategy CT/AVS, all patients proceeded to AVS unless no abnormality is found on CT scan. cMRA – cost of spironolactone.

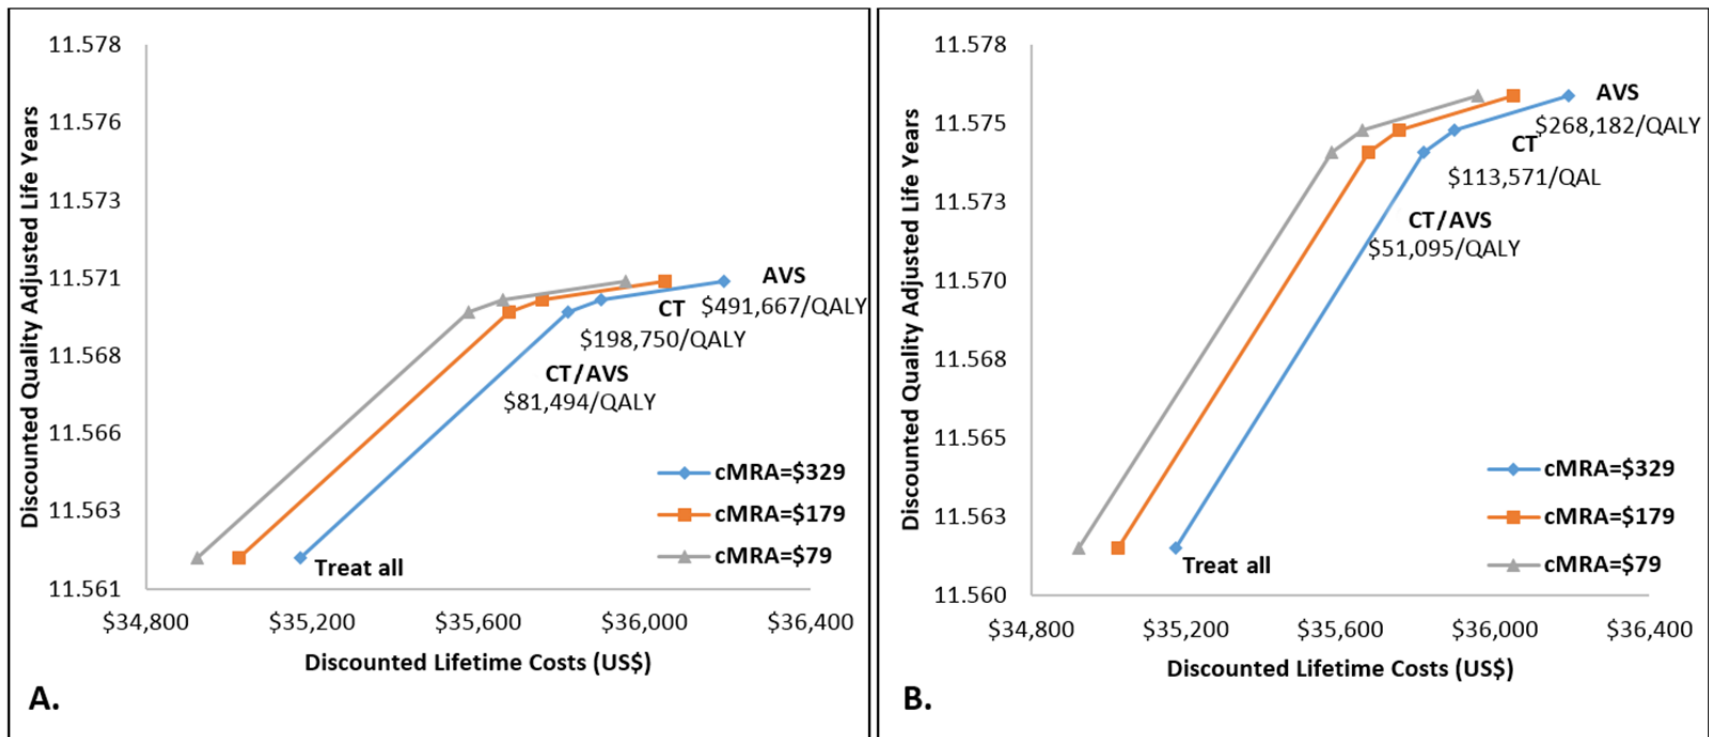



**Supplemental Figure 6.** Efficiency frontiers including only patients who confirmed having a current prescription of antihypertensive medications: A) base-case analysis considering only effects of CVD on HRQoL, and B) base-case analysis with differential patient-reported HRQoL associated with untreated PA. Only non-dominated strategies shown. In strategy CT/AVS, all patients proceeded to AVS unless no abnormality is found on CT scan.

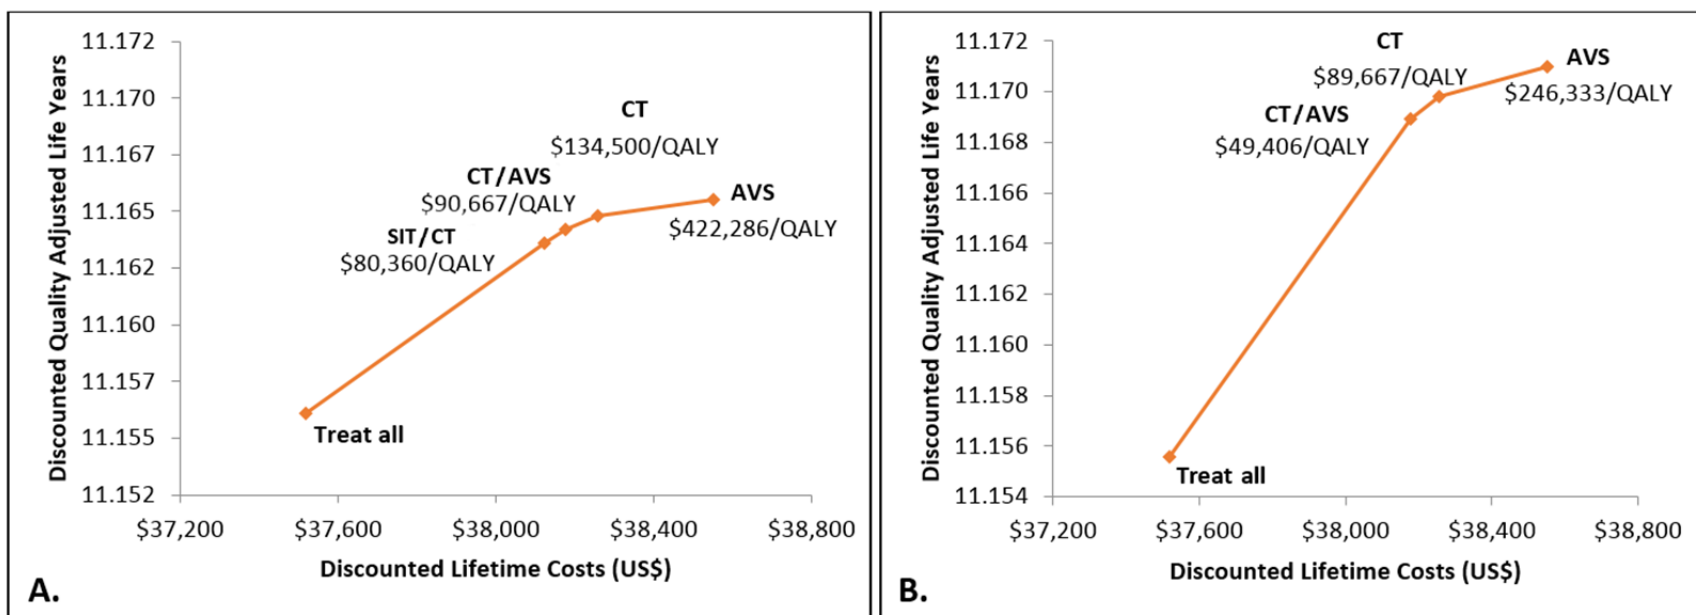

## Supplemental References

1. Funder JW, Carey RM, Fardella C, Gomez-Sanchez CE, Mantero F, Stowasser M, Young WF, Jr., Montori VM. Case detection, diagnosis, and treatment of patients with primary aldosteronism: An endocrine society clinical practice guideline. *J Clin Endocrinol Metab.* 2008;93:3266-3281
2. Zeiger MA, Thompson GB, Duh QY, Hamrahian AH, Angelos P, Elaraj D, Fishman E, Kharlip J. The american association of clinical endocrinologists and american association of endocrine surgeons medical guidelines for the management of adrenal incidentalomas. *Endocr Pract.* 2009;15 Suppl 1:1-20
3. Gaddam K, Corros C, Pimenta E, Ahmed M, Denney T, Aban I, Inusah S, Gupta H, Lloyd SG, Oparil S, Husain A, Dell'Italia LJ, Calhoun DA. Rapid reversal of left ventricular hypertrophy and intracardiac volume overload in patients with resistant hypertension and hyperaldosteronism: A prospective clinical study. *Hypertension.* 2010;55:1137-1142
4. Pang TC, Bambach C, Monaghan JC, Sidhu SB, Bune A, Delbridge LW, Sywak MS. Outcomes of laparoscopic adrenalectomy for hyperaldosteronism. *ANZ J Surg.* 2007;77:768-773
5. Vaclavik J, Sedlak R, Plachy M, Navratil K, Plasek J, Jarkovsky J, Vaclavik T, Husar R, Kocianova E, Taborsky M. Addition of spironolactone in patients with resistant arterial hypertension (aspirant): A randomized, double-blind, placebo-controlled trial. *Hypertension.* 2011;57:1069-1075
6. Ahmed AH, Gordon RD, Sukor N, Pimenta E, Stowasser M. Quality of life in patients with bilateral primary aldosteronism before and during treatment with spironolactone and/or amiloride, including a comparison with our previously published results in those with unilateral disease treated surgically. *J Clin Endocrinol Metab.* 2011;96:2904-2911
7. Waldmann J, Maurer L, Holler J, Kann PH, Ramaswamy A, Bartsch DK, Langer P. Outcome of surgery for primary hyperaldosteronism. *World J Surg.* 2011;35:2422-2427
8. Anderson JL, Heidenreich PA, Barnett PG, Creager MA, Fonarow GC, Gibbons RJ, Halperin JL, Hlatky MA, Jacobs AK, Mark DB, Masoudi FA, Peterson ED, Shaw LJ. Acc/aha statement on cost/value methodology in clinical practice guidelines and performance measures: A report of the american college of cardiology/american heart association task force on performance measures and task force on practice guidelines. *Circulation.* 2014;129:2329-2345
9. Apfelbaum JL, Connis RT, Nickinovich DG, Pasternak LR, Arens JF, Caplan RA, Connis RT, Fleisher LA, Flowerdew R, Gold BS, Mayhew JF, Nickinovich DG, Rice LJ, Roizen MF, Twersky RS. Practice advisory for preanesthesia evaluation: An updated report by the american society of anesthesiologists task force on preanesthesia evaluation. *Anesthesiology.* 2012;116:522-538
10. Boland GW, Blake MA, Hahn PF, Mayo-Smith WW. Incidental adrenal lesions: Principles, techniques, and algorithms for imaging characterization. *Radiology.* 2008;249:756-775
11. Young WF, Jr. Clinical practice. The incidentally discovered adrenal mass. *N Engl J Med.* 2007;356:601-610
12. Gaziano TA, Steyn K, Cohen DJ, Weinstein MC, Opie LH. Cost-effectiveness analysis of hypertension guidelines in south africa: Absolute risk versus blood pressure level. *Circulation.* 2005;112:3569-3576
13. Egan BM, Zhao Y, Axon RN, Brzezinski WA, Ferdinand KC. Uncontrolled and apparent treatment resistant hypertension in the united states, 1988 to 2008. *Circulation.* 2011;124:1046-1058
14. Pandya A, Sy S, Cho S, Weinstein MC, Gaziano TA. Cost-effectiveness of 10-year risk thresholds for initiation of statin therapy for primary prevention of cardiovascular disease. *Jama.* 2015;314:142-150
15. Gold MR, Siegel, J.E., Russell, L.B., Weinstein, M.C. *Cost-effectiveness in health and medicine.* Oxford University Press; 1996.

16. Centers for medicare and medicaid services. Medicare reimbursement schedule. (accessed november 15, 2013, at [www.Cms.Hhs.Gov/](http://www.Cms.Hhs.Gov/)).
17. Sullivan PW, Ghushchyan V. Preference-based eq-5d index scores for chronic conditions in the united states. *Med Decis Making*. 2006;26:410-420
18. Kunzel HE, Apostolopoulou K, Pallauf A, Gerum S, Merkle K, Schulz S, Fischer E, Brand V, Bidlingmaier M, Endres S, Beuschlein F, Reincke M. Quality of life in patients with primary aldosteronism: Gender differences in untreated and long-term treated patients and associations with treatment and aldosterone. *J Psychiatr Res*. 2012;46:1650-1654
19. Sonino N, Tomba E, Genesia ML, Bertello C, Mulatero P, Veglio F, Fava GA, Fallo F. Psychological assessment of primary aldosteronism: A controlled study. *J Clin Endocrinol Metab*. 2011;96:E878-883
20. Stout NK, Goldie SJ. Keeping the noise down: Common random numbers for disease simulation modeling. *Health care management science*. 2008;11:399-406
21. Centers for Disease Control and Prevention (CDC). National Center for Health Statistics (NCHS). National health and nutrition examination survey. 2011
22. Pandya A, Gaziano TA, Weinstein MC, Cutler D. More americans living longer with cardiovascular disease will increase costs while lowering quality of life. *Health Aff (Millwood)*. 2013;32:1706-1714
23. Wolf PA, D'Agostino RB, Belanger AJ, Kannel WB. Probability of stroke: A risk profile from the framingham study. *Stroke; a journal of cerebral circulation*. 1991;22:312-318
24. Anderson KM, Odell PM, Wilson PW, Kannel WB. Cardiovascular disease risk profiles. *American heart journal*. 1991;121:293-298
25. Calhoun DA, Jones D, Textor S, Goff DC, Murphy TP, Toto RD, White A, Cushman WC, White W, Sica D, Ferdinand K, Giles TD, Falkner B, Carey RM. Resistant hypertension: Diagnosis, evaluation, and treatment: A scientific statement from the american heart association professional education committee of the council for high blood pressure research. *Circulation*. 2008;117:e510-526
26. Calhoun DA, Nishizaka MK, Zaman MA, Thakkar RB, Weissmann P. Hyperaldosteronism among black and white subjects with resistant hypertension. *Hypertension*. 2002;40:892-896
27. Douma S, Petidis K, Doumas M, Papaefthimiou P, Triantafyllou A, Kartali N, Papadopoulos N, Vogiatzis K, Zamboulis C. Prevalence of primary hyperaldosteronism in resistant hypertension: A retrospective observational study. *Lancet*. 2008;371:1921-1926
28. Garcia EA, Lopez JR, Meier JL, Swislocki AL, Siegel D. Resistant hypertension and undiagnosed primary hyperaldosteronism detected by use of a computerized database. *J Clin Hypertens (Greenwich)*. 2011;13:487-491
29. Strauch B, Zelinka T, Hampf M, Bernhardt R, Widimsky J, Jr. Prevalence of primary hyperaldosteronism in moderate to severe hypertension in the central europe region. *J Hum Hypertens*. 2003;17:349-352
30. Rossi GP, Bernini G, Caliumi C, Desideri G, Fabris B, Ferri C, Ganzaroli C, Giacchetti G, Letizia C, Maccario M, Mallamaci F, Mannelli M, Mattarello MJ, Moretti A, Palumbo G, Parenti G, Porteri E, Semplicini A, Rizzoni D, Rossi E, Boscaro M, Pessina AC, Mantero F. A prospective study of the prevalence of primary aldosteronism in 1,125 hypertensive patients. *J Am Coll Cardiol*. 2006;48:2293-2300
31. Doppman JL, Gill JR, Jr. Hyperaldosteronism: Sampling the adrenal veins. *Radiology*. 1996;198:309-312
32. Sang X, Jiang Y, Wang W, Yan L, Zhao J, Peng Y, Gu W, Chen G, Liu W, Ning G. Prevalence of and risk factors for primary aldosteronism among patients with resistant hypertension in china. *J Hypertens*. 2013;31:1465-1471; discussion 1471-1462
33. Miyake Y, Tanaka K, Nishikawa T, Naruse M, Takayanagi R, Sasano H, Takeda Y, Shibata H, Sone M, Satoh F, Yamada M, Ueshiba H, Katabami T, Iwasaki Y, Tanaka H, Tanahashi Y,

- Suzuki S, Hasegawa T, Katsumata N, Tajima T, Yanase T. Prognosis of primary aldosteronism in Japan: Results from a nationwide epidemiological study. *Endocr J*. 2014;61:35-40
34. Bovio S, Cataldi A, Reimondo G, Sperone P, Novello S, Berruti A, Borasio P, Fava C, Dogliotti L, Scagliotti GV, Angeli A, Terzolo M. Prevalence of adrenal incidentaloma in a contemporary computerized tomography series. *J Endocrinol Invest*. 2006;29:298-302
  35. Abecassis M, McLoughlin MJ, Langer B, Kudlow JE. Serendipitous adrenal masses: Prevalence, significance, and management. *Am J Surg*. 1985;149:783-788
  36. Glazer HS, Weyman PJ, Sagel SS, Levitt RG, McClennan BL. Nonfunctioning adrenal masses: Incidental discovery on computed tomography. *AJR Am J Roentgenol*. 1982;139:81-85
  37. Hedeland H, Ostberg G, Hokfelt B. On the prevalence of adrenocortical adenomas in an autopsy material in relation to hypertension and diabetes. *Acta Med Scand*. 1968;184:211-214
  38. Young WF, Jr. Management approaches to adrenal incidentalomas. A view from Rochester, Minnesota. *Endocrinol Metab Clin North Am*. 2000;29:159-185, x
  39. Mansmann G, Lau J, Balk E, Rothberg M, Miyachi Y, Bornstein SR. The clinically inapparent adrenal mass: Update in diagnosis and management. *Endocr Rev*. 2004;25:309-340
  40. Barzon L, Sonino N, Fallo F, Palu G, Boscaro M. Prevalence and natural history of adrenal incidentalomas. *Eur J Endocrinol*. 2003;149:273-285
  41. Song JH, Chaudhry FS, Mayo-Smith WW. The incidental adrenal mass on CT: Prevalence of adrenal disease in 1,049 consecutive adrenal masses in patients with no known malignancy. *AJR Am J Roentgenol*. 2008;190:1163-1168
  42. Terzolo M, Stigliano A, Chiodini I, Loli P, Furlani L, Arnaldi G, Reimondo G, Pia A, Toscano V, Zini M, Borretta G, Papini E, Garofalo P, Allolio B, Dupas B, Mantero F, Tabarin A, Italian Association of Clinical E. A position statement on adrenal incidentaloma. *Eur J Endocrinol*. 2011;164:851-870
  43. Zeiger MA, Siegelman SS, Hamrahian AH. Medical and surgical evaluation and treatment of adrenal incidentalomas. *J Clin Endocrinol Metab*. 2011;96:2004-2015
  44. Bernini G, Moretti A, Orlandini C, Berti P, Miccoli P, Bardini M, Taurino C, Bernini M, Salvetti A. Plasma and urine aldosterone to plasma renin activity ratio in the diagnosis of primary aldosteronism. *J Hypertens*. 2008;26:981-988
  45. Jansen PM, van den Born BJ, Frenkel WJ, de Bruijne EL, Deinum J, Kerstens MN, Smulders YM, Woittiez AJ, Wijbenga JA, Zietse R, Danser AH, van den Meiracker AH. Test characteristics of the aldosterone-to-renin ratio as a screening test for primary aldosteronism. *J Hypertens*. 2014;32:115-126
  46. Nishizaka MK, Pratt-Ubunama M, Zaman MA, Cofield S, Calhoun DA. Validity of plasma aldosterone-to-renin activity ratio in African American and white subjects with resistant hypertension. *Am J Hypertens*. 2005;18:805-812
  47. Schwartz GL, Turner ST. Screening for primary aldosteronism in essential hypertension: Diagnostic accuracy of the ratio of plasma aldosterone concentration to plasma renin activity. *Clin Chem*. 2005;51:386-394
  48. Mulatero P, Milan A, Fallo F, Regolisti G, Pizzolo F, Fardella C, Mosso L, Marafetti L, Veglio F, Maccario M. Comparison of confirmatory tests for the diagnosis of primary aldosteronism. *J Clin Endocrinol Metab*. 2006;91:2618-2623
  49. Nanba K, Tamanaha T, Nakao K, Kawashima ST, Usui T, Tagami T, Okuno H, Shimatsu A, Suzuki T, Naruse M. Confirmatory testing in primary aldosteronism. *J Clin Endocrinol Metab*. 2012;97:1688-1694
  50. Rossi GP, Belfiore A, Bernini G, Desideri G, Fabris B, Ferri C, Giacchetti G, Letizia C, Maccario M, Mallamaci F, Mannelli M, Palumbo G, Rizzoni D, Rossi E, Agabiti-Rosei E, Pessina AC, Mantero F, Primary Aldosteronism Prevalence in Italy Study I. Comparison of the captopril and the saline infusion test for excluding aldosterone-producing adenoma. *Hypertension*. 2007;50:424-431

51. Schirpenbach C, Seiler L, Maser-Gluth C, Rudiger F, Nickel C, Beuschlein F, Reincke M. Confirmatory testing in normokalaemic primary aldosteronism: The value of the saline infusion test and urinary aldosterone metabolites. *Eur J Endocrinol.* 2006;154:865-873
52. Magill SB, Raff H, Shaker JL, Brickner RC, Knechtges TE, Kehoe ME, Findling JW. Comparison of adrenal vein sampling and computed tomography in the differentiation of primary aldosteronism. *J Clin Endocrinol Metab.* 2001;86:1066-1071
53. Young WF, Stanson AW, Thompson GB, Grant CS, Farley DR, van Heerden JA. Role for adrenal venous sampling in primary aldosteronism. *Surgery.* 2004;136:1227-1235
54. Kempers MJ, Lenders JW, van Outheusden L, van der Wilt GJ, Schultze Kool LJ, Hermus AR, Deinum J. Systematic review: Diagnostic procedures to differentiate unilateral from bilateral adrenal abnormality in primary aldosteronism. *Ann Intern Med.* 2009;151:329-337
55. Nwariaku FE, Miller BS, Auchus R, Holt S, Watumull L, Dolmatch B, Nesbitt S, Vongpatanasin W, Victor R, Wians F, Livingston E, Snyder WH, 3rd. Primary hyperaldosteronism: Effect of adrenal vein sampling on surgical outcome. *Arch Surg.* 2006;141:497-502; discussion 502-493
56. Minami I, Yoshimoto T, Hirono Y, Izumiyama H, Doi M, Hirata Y. Diagnostic accuracy of adrenal venous sampling in comparison with other parameters in primary aldosteronism. *Endocr J.* 2008;55:839-846
57. Rossi GP, Pitter G, Bernante P, Motta R, Feltrin G, Miotto D. Adrenal vein sampling for primary aldosteronism: The assessment of selectivity and lateralization of aldosterone excess baseline and after adrenocorticotrophic hormone (acth) stimulation. *J Hypertens.* 2008;26:989-997
58. Vonend O, Ockenfels N, Gao X, Allolio B, Lang K, Mai K, Quack I, Saleh A, Degenhart C, Seufert J, Seiler L, Beuschlein F, Quinkler M, Podrabsky P, Bidlingmaier M, Lorenz R, Reincke M, Rump LC, German Conn's R. Adrenal venous sampling: Evaluation of the german conn's registry. *Hypertension.* 2011;57:990-995
59. Rossi GP, Barisa M, Allolio B, Auchus RJ, Amar L, Cohen D, Degenhart C, Deinum J, Fischer E, Gordon R, Kickuth R, Kline G, Lacroix A, Magill S, Miotto D, Naruse M, Nishikawa T, Omura M, Pimenta E, Plouin PF, Quinkler M, Reincke M, Rossi E, Rump LC, Satoh F, Schultze Kool L, Seccia TM, Stowasser M, Tanabe A, Trerotola S, Vonend O, Widimsky J, Jr., Wu KD, Wu VC, Pessina AC. The adrenal vein sampling international study (avis) for identifying the major subtypes of primary aldosteronism. *J Clin Endocrinol Metab.* 2012;97:1606-1614
60. Nigri G, Rosman AS, Petrucciani N, Fancellu A, Pisano M, Zorcolo L, Ramacciato G, Melis M. Meta-analysis of trials comparing laparoscopic transperitoneal and retroperitoneal adrenalectomy. *Surgery.* 2013;153:111-119
61. Alvarez-Alvarez B, Abad-Cardiel M, Fernandez-Cruz A, Martell-Claros N. Management of resistant arterial hypertension: Role of spironolactone versus double blockade of the renin-angiotensin-aldosterone system. *J Hypertens.* 2010;28:2329-2335
62. Chapman N, Dobson J, Wilson S, Dahlof B, Sever PS, Wedel H, Poulter NR. Effect of spironolactone on blood pressure in subjects with resistant hypertension. *Hypertension.* 2007;49:839-845
63. Nishizaka MK, Calhoun DA. The role of aldosterone antagonists in the management of resistant hypertension. *Curr Hypertens Rep.* 2005;7:343-347
64. Catena C, Colussi G, Lapenna R, Nadalini E, Chiuch A, Gianfagna P, Sechi LA. Long-term cardiac effects of adrenalectomy or mineralocorticoid antagonists in patients with primary aldosteronism. *Hypertension.* 2007;50:911-918
65. Judd E, Calhoun DA. Apparent and true resistant hypertension: Definition, prevalence and outcomes. *J Hum Hypertens.* 2014;28:463-468
66. Heron M. Deaths: Leading causes for 2006. *National Vital Statistics Reports.* 2010;58
67. Weinstein MC, Coxson PG, Williams LW, Pass TM, Stason WB, Goldman L. Forecasting coronary heart disease incidence, mortality, and cost: The coronary heart disease policy model. *American journal of public health.* 1987;77:1417-1426

68. National Heart Lung and Blood Institute (NHLBI). Incidence & prevalence: 2006 chart book on cardiovascular and lung diseases. 2006
69. Smolina K, Wright FL, Rayner M, Goldacre MJ. Long-term survival and recurrence after acute myocardial infarction in england, 2004 to 2010. *Circulation. Cardiovascular quality and outcomes*. 2012;5:532-540
70. Dennis MS, Burn JP, Sandercock PA, Bamford JM, Wade DT, Warlow CP. Long-term survival after first-ever stroke: The oxfordshire community stroke project. *Stroke; a journal of cerebral circulation*. 1993;24:796-800
71. Nichol G, Thomas E, Callaway CW, Hedges J, Powell JL, Aufderheide TP, Rea T, Lowe R, Brown T, Dreyer J, Davis D, Idris A, Stiell I. Regional variation in out-of-hospital cardiac arrest incidence and outcome. *Jama*. 2008;300:1423-1431
72. Go AS, Mozaffarian D, Roger VL, Benjamin EJ, Berry JD, Blaha MJ, Dai S, Ford ES, Fox CS, Franco S, Fullerton HJ, Gillespie C, Hailpern SM, Heit JA, Howard VJ, Huffman MD, Judd SE, Kissela BM, Kittner SJ, Lackland DT, Lichtman JH, Lisabeth LD, Mackey RH, Magid DJ, Marcus GM, Marelli A, Matchar DB, McGuire DK, Mohler ER, 3rd, Moy CS, Mussolino ME, Neumar RW, Nichol G, Pandey DK, Paynter NP, Reeves MJ, Sorlie PD, Stein J, Towfighi A, Turan TN, Virani SS, Wong ND, Woo D, Turner MB. Executive summary: Heart disease and stroke statistics--2014 update: A report from the american heart association. *Circulation*. 2014;129:399-410
73. Fang J, Alderman MH, Keenan NL, Ayala C. Acute myocardial infarction hospitalization in the united states, 1979 to 2005. *The American journal of medicine*. 2010;123:259-266
74. Dorros G, Cowley MJ, Janke L, Kelsey SF, Mullin SM, Van Raden M. In-hospital mortality rate in the national heart, lung, and blood institute percutaneous transluminal coronary angioplasty registry. *The American journal of cardiology*. 1984;53:17C-21C
75. Capewell S, Murphy NF, MacIntyre K, Frame S, Stewart S, Chalmers JW, Boyd J, Finlayson A, Redpath A, McMurray JJ. Short-term and long-term outcomes in 133,429 emergency patients admitted with angina or myocardial infarction in scotland, 1990-2000: Population-based cohort study. *Heart (British Cardiac Society)*. 2006;92:1563-1570
76. Comparison of coronary bypass surgery with angioplasty in patients with multivessel disease. The bypass angioplasty revascularization investigation (bari) investigators. *The New England journal of medicine*. 1996;335:217-225
77. Jokhadar M, Jacobsen SJ, Reeder GS, Weston SA, Roger VL. Sudden death and recurrent ischemic events after myocardial infarction in the community. *American journal of epidemiology*. 2004;159:1040-1046
78. Peterson ED, Coombs LP, DeLong ER, Haan CK, Ferguson TB. Procedural volume as a marker of quality for cabg surgery. *Jama*. 2004;291:195-201
79. Hsia J, Jablonski KA, Rice MM, Sabatine MS, Zabalgoitia M, Maggioni A, Cuddy TE, Domanski MJ, Geller NL, Flaker G, Solomon S, Omland T, Rouleau JL. Sudden cardiac death in patients with stable coronary artery disease and preserved left ventricular systolic function. *The American journal of cardiology*. 2008;101:457-461
80. Hemingway H, Shipley M, Britton A, Page M, Macfarlane P, Marmot M. Prognosis of angina with and without a diagnosis: 11 year follow up in the whitehall ii prospective cohort study. *BMJ (Clinical research ed.)*. 2003;327:895
81. Ford ES, Ajani UA, Croft JB, Critchley JA, Labarthe DR, Kottke TE, Giles WH, Capewell S. Explaining the decrease in u.s. Deaths from coronary disease, 1980-2000. *The New England journal of medicine*. 2007;356:2388-2398
82. Law MR, Watt HC, Wald NJ. The underlying risk of death after myocardial infarction in the absence of treatment. *Archives of internal medicine*. 2002;162:2405-2410
83. Lee KK, Cipriano LE, Owens DK, Go AS, Hlatky MA. Cost-effectiveness of using high-sensitivity c-reactive protein to identify intermediate- and low-cardiovascular-risk individuals for statin therapy. *Circulation*. 2010;122:1478-1487

84. Hardie K, Hankey GJ, Jamrozik K, Broadhurst RJ, Anderson C. Ten-year risk of first recurrent stroke and disability after first-ever stroke in the perth community stroke study. *Stroke; a journal of cerebral circulation*. 2004;35:731-735
85. Touze E, Varenne O, Chatellier G, Peyrard S, Rothwell PM, Mas JL. Risk of myocardial infarction and vascular death after transient ischemic attack and ischemic stroke: A systematic review and meta-analysis. *Stroke; a journal of cerebral circulation*. 2005;36:2748-2755
